# Supplementary material
Source: MDPI journal article supplement (https://www.mdpi.com/2504-446X/5/3/80)
Supplement: s1 [file s1]

Supplementary Materials

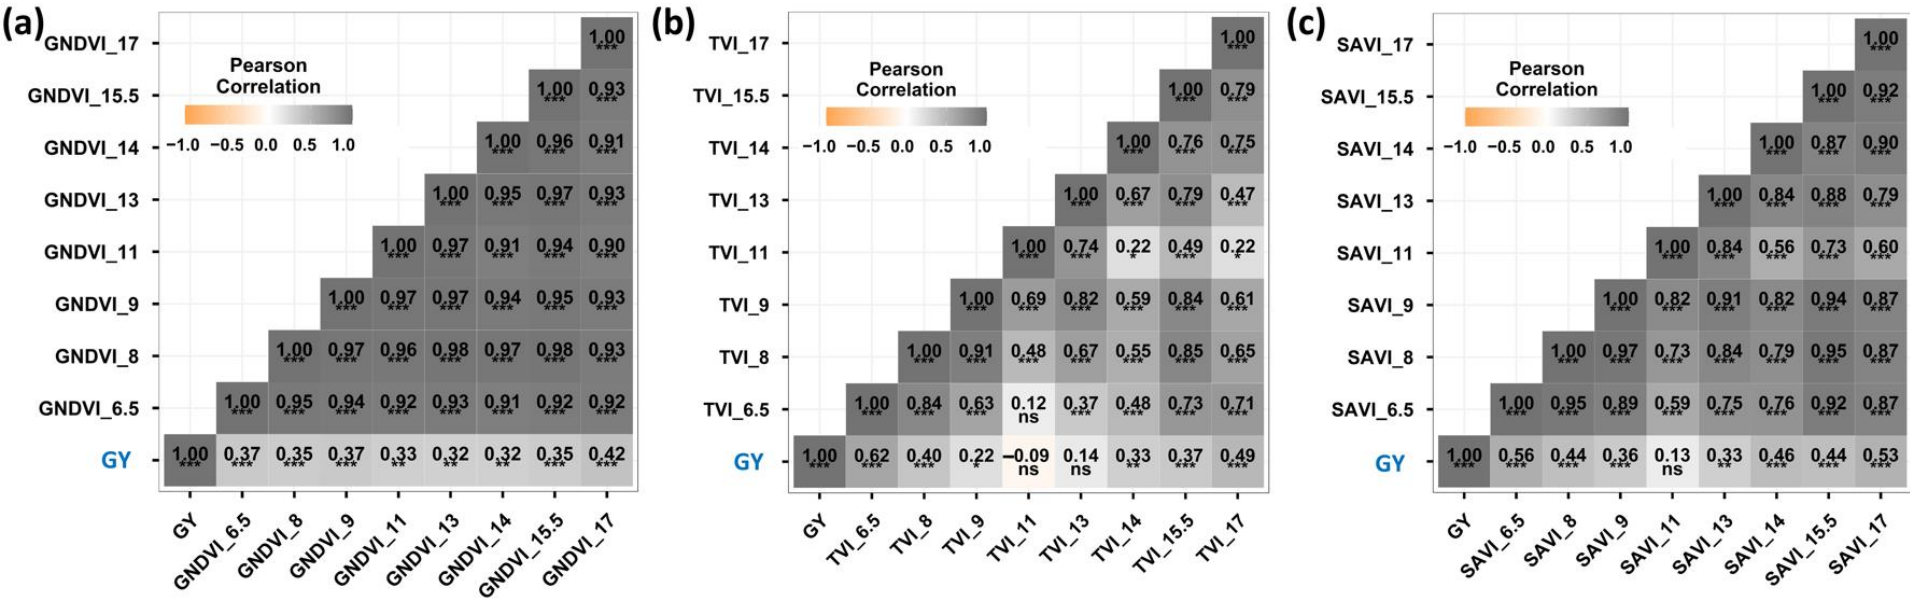

Figure S1. Pearson correlation between pea grain yield (GY) and green normalized difference vegetation index (GNDVI), transformed vegetation index (TVI), and soil adjusted vegetation index (SAVI) across SZAs [06:30 (88.08°), 08:00 (73.98°), 09:00 (63.82°), 11:00 (43.50°); 13:00 (28.00°), 14:00 (25.79°), 15:30 (32.33°)].

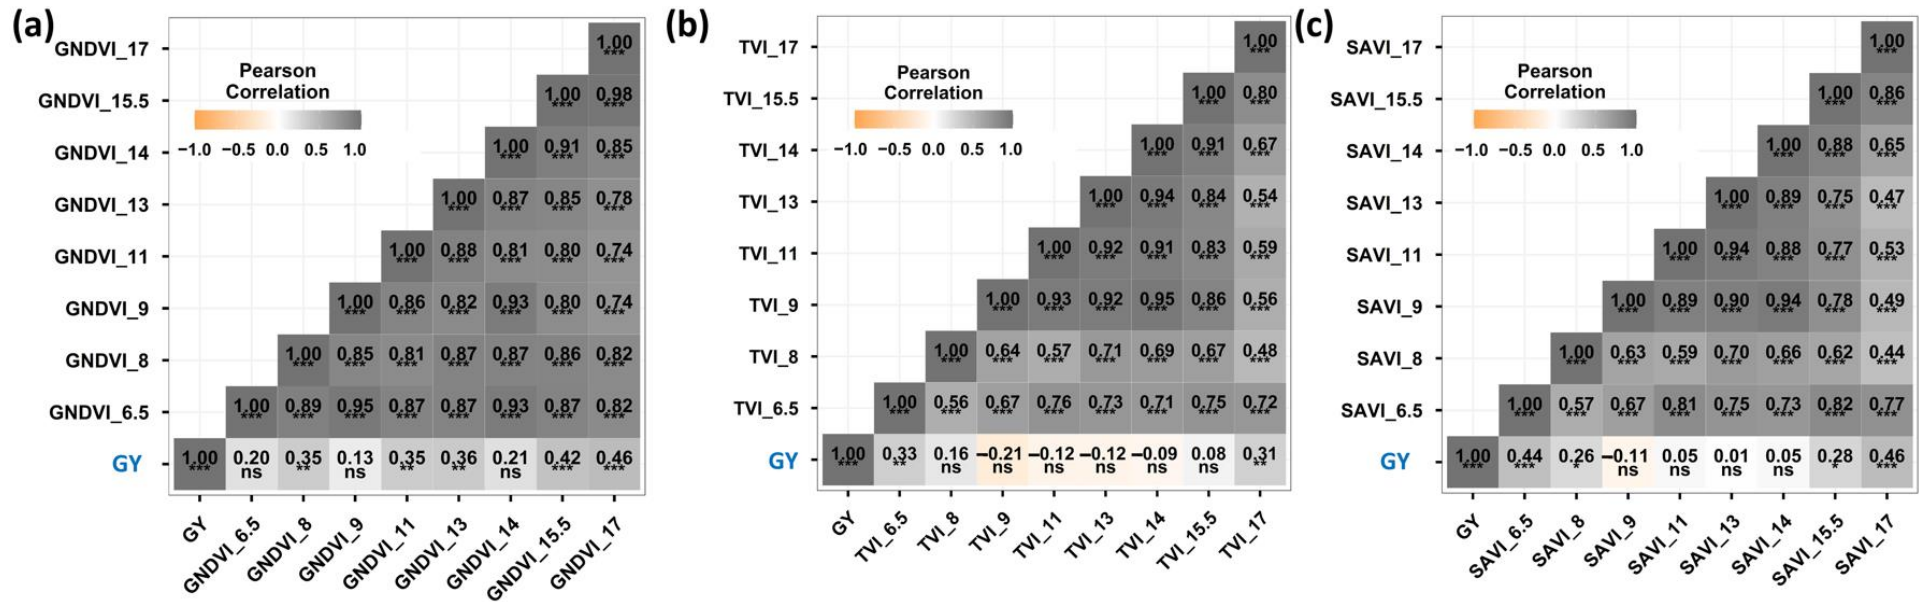

**Figure S2.** Pearson correlation between chickpea grain yield (GY) and green normalized difference vegetation index (GNDVI), transformed vegetation index (TVI), and soil adjusted vegetation index (SAVI) across SZA [06:30 (88.08°), 08:00 (73.98°), 09:00 (63.82°), 11:00 (43.50°); 13:00 (28.00°), 14:00 (25.79°), 15:30 (32.33°)].

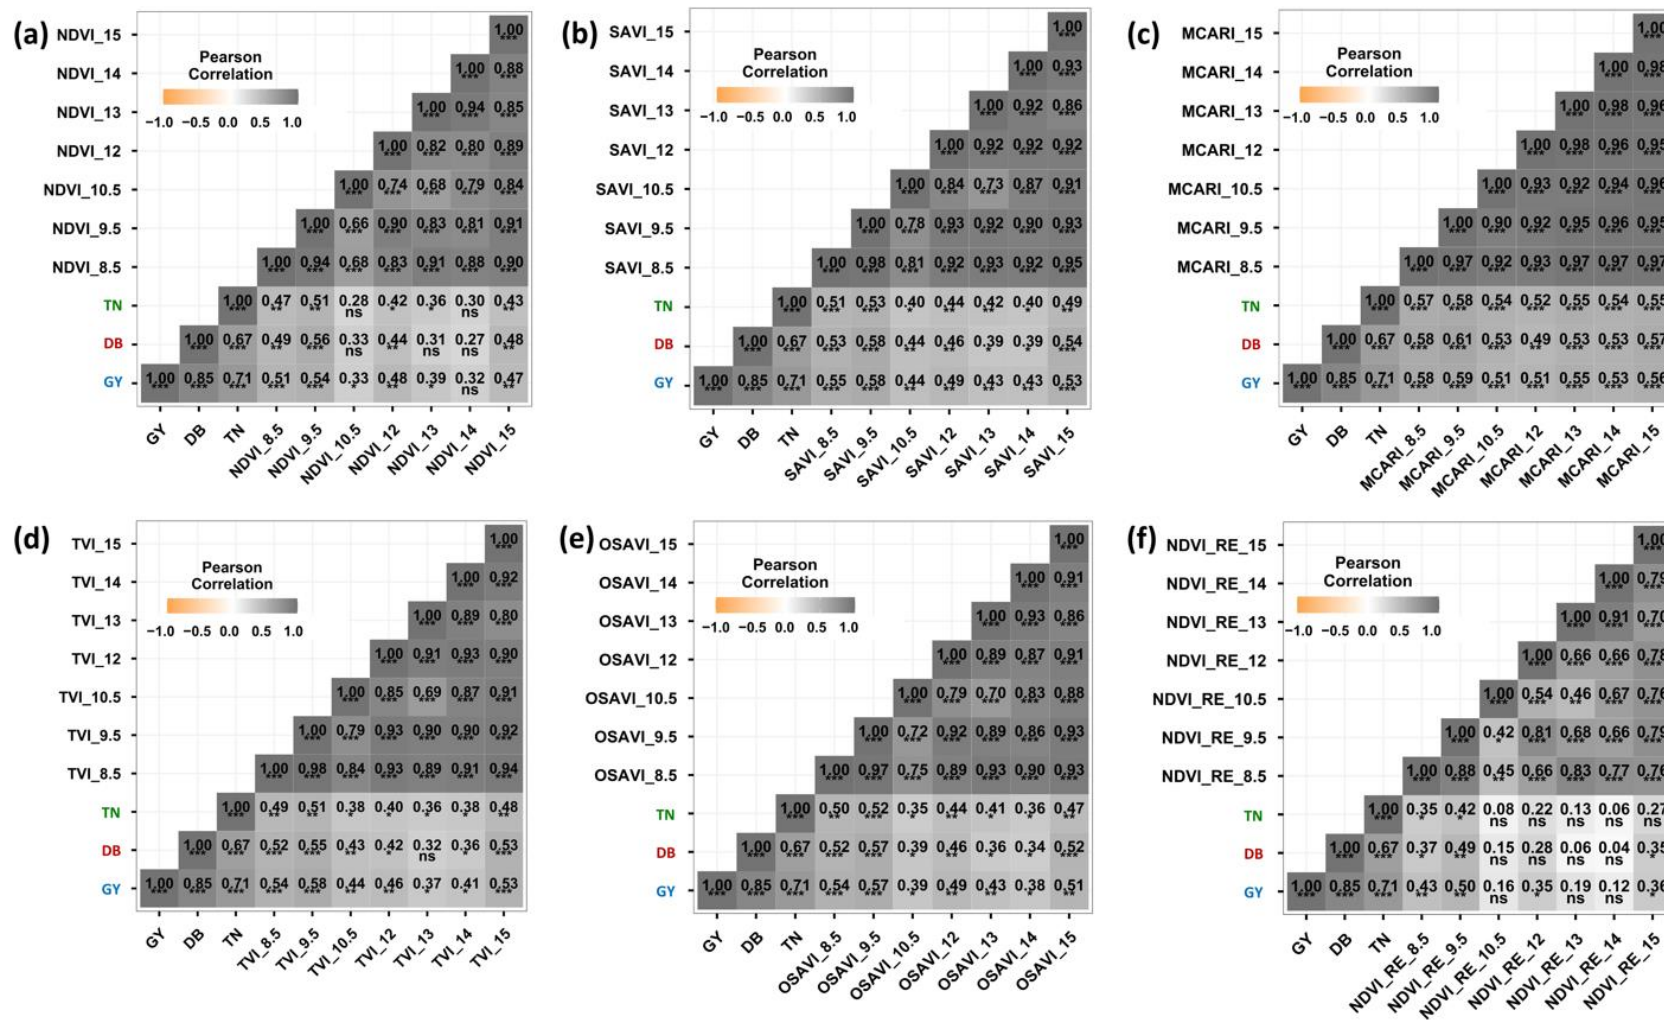

**Figure S3.** Pearson correlation between IR64 rice agronomic traits (grain yield, dry biomass and tiller number) and normalized difference vegetation index (NDVI), soil adjusted vegetation index (SAVI), modified chlorophyll absorption in reflectance index (MCARI), green normalized difference vegetation index (GNDVI), transformed vegetation index (TVI), optimized soil-adjusted vegetation index (OSAVI) and normalized difference vegetation index red-edge (NDVI<sub>RE</sub>) across SZA [08:30 (53.31°), 09:30 (38.42°), 10:30 (23.56°), 12:00 (3.11°), 13:00 (14.29°), 14:00 (29.07°), and 15:00 (43.95°)].

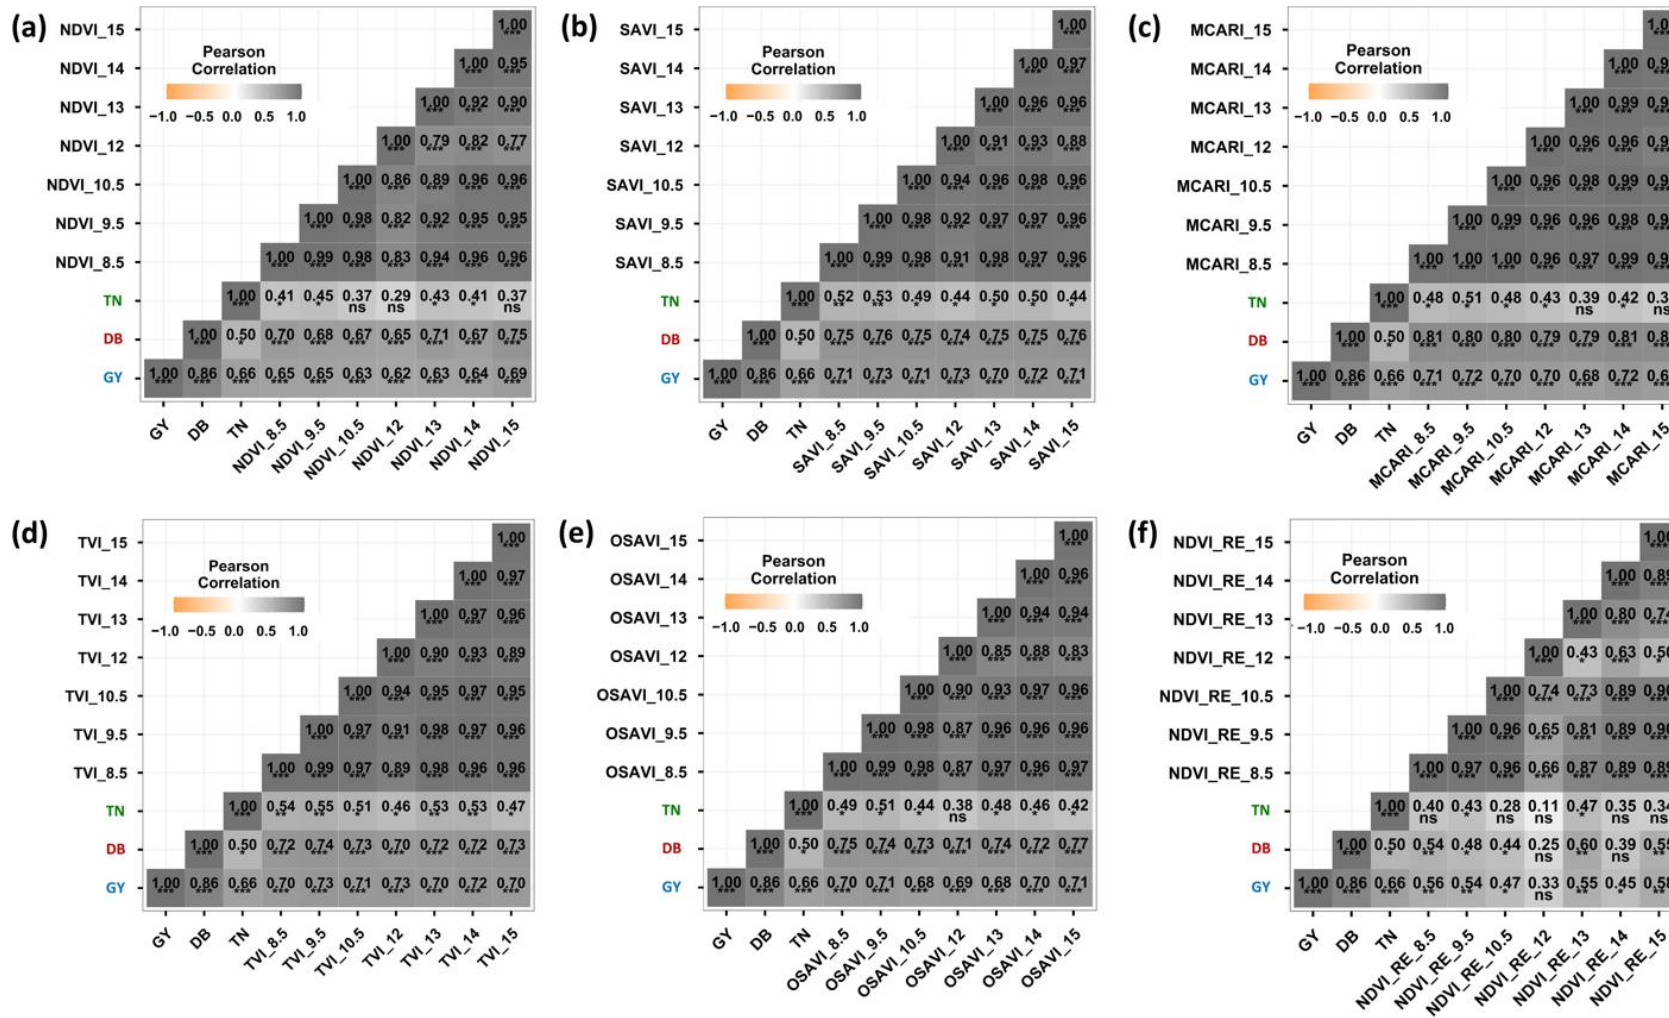

**Figure S4.** Pearson correlation between Ciherang rice agronomic traits (grain yield, dry biomass and tiller number) and normalized difference vegetation index (NDVI), soil adjusted vegetation index (SAVI), modified chlorophyll absorption in reflectance index (MCARI), green normalized difference vegetation index (GNDVI), transformed vegetation index (TVI), optimized soil-adjusted vegetation index (OSAVI) and normalized difference vegetation index red-edge (NDVI<sub>RE</sub>) across SZA [08:30 (53.31°), 09:30 (38.42°), 10:30 (23.56°), 12:00 (3.11°), 13:00 (14.29°), 14:00 (29.07°), and 15:00 (43.95°)].
